# Supplementary material for: Sublethal DNA Damage Switches Off B-Cell Effector Programs in an RA-FLS- PBMC Co-culture
Source: Research Square preprint supplement (doi:10.21203/rs.3.rs-7912272/v1), 2025-11-17
Supplement: Supplementary file 1 [file 140ed6143e35641328fcd5d1.docx]

**Supplementary Table S1: All used compounds and Antibodies for the study.**

| Antibody/Compound/Kit | Fluorochrome | Species | Company | Catalog Nr. | Final Concentration |
| --- | --- | --- | --- | --- | --- |
| CD19 | efluor 405 | Human | Invitrogen |  | 1:20 |
| CD27 | VioBright R720 | Human | Miltenyi Biotec | 130-128-404 | 1:50 |
| CD4 | PerCP/Vio700 | Human | Miltenyi Biotec | 130-113-228 | 1:50 |
| CD8 | VioGreen | Human | Miltenyi Biotec | 130-110-684 | 1:50 |
| CD3 | PE/Vio770 | Human | Miltenyi Biotec | 130-113-140 | 1:50 |
| y-H2AX | Alexa Fluor 488 | Human | BD Biosciences | 560445 | 1:20 |
| KI-67 | FITC | Human | Miltenyi Biotec | 130-117-691 | 1:50 |
| PI | - | Human | Miltenyi Biotec | 130-093-233 | 1:100 |
| Annexin V/PI kit | FITC | Human | Miltenyi Biotec | 130-092-052 |  |
| Fcr-blocking reagent |  | Human | Miltenyi Biotec | 130-059-901 | 1:5 |
| y-IR : Gammacell 100 Elite radiation machine |  |  | Nordion International |  |  |
| 4-OOH IFA |  |  | Niomech IIT GmbH | D-18851 |  |
| H₂O₂ |  |  | Sigma-Aldrich | [7722-84-1](https://www.sigmaaldrich.com/DE/en/search/7722-84-1?focus=products&page=1&perpage=30&sort=relevance&term=7722-84-1&type=cas_number) |  |
| CpG ODN 2006 |  | human | Invivogen | tlrl-2006-1 | 5 µg/mL |
| Human IL-10 ELISA set |  | human | BD Biosciences | 555157 |  |
| Human IFN-y ELISA set |  | human | BD Biosciences | 555142 |  |
| Human APRIL/TNFSF13 DuoSet ELISA |  | human | R&D | DY884B |  |
| Human IL-2 DuoSet ELISA |  | human | R&D | DY202-05 |  |
| Human IL-2 Ra/CD25 DuoSet ELISA |  | human | R&D | DY223 |  |
| Human IgM ELISA Antibody Pair Kit |  | human | StemCell | #01995A |  |
| Human IgG ELISA Antibody Pair Kit |  | human | StemCell | #01994A |  |
| Human IgA ELISA Antibody Pair Kit |  | human | StemCell | #01992A |  |
| Human IgE ELISA Antibody Pair Kit |  | human | StemCell | #01993A |  |

**Supplementary Table S2:** List of utilized RT-qPCR primers. All primer sequences are listed from 5´ to 3´.

| **Gene** | **Forward Primer (5'-3')** | **Reverse Primer (5'-3')** |
| --- | --- | --- |
| ***ATM*** | *TCGGCATTCAGATTCCAAACAA* | *TGCCAAATTCATATGCAAGGC* |
| ***APEX-1*** | *TCTGCCCCACCTCTTGATTG* | *ACTCCAGTCGTACCAGACCT* |
| ***XRCC6*** | *TTGATGCCTCCAAGGCTATGTT* | *AAAGGTAGTCTTACCTGGATGC* |
| ***XRCC5*** | *AGGTGAAGATGGGTTGGATGAA* | *GAGTGGCCCAGAAAAAGGAA* |
| ***RAD50*** | *CTGGAGATTTCCCTCCTGGAAC* | *CAACGGTTACTACTGGGTGCT* |
| ***RAD51*** | *CAAGTGGATGGAGCAGCGAT* | *ACTGATCCCATCAACACCTTACC* |
| ***BRCA1*** | *TGGAGGGGATAGGTCTTTGGA* | *GAACAGTACAGTCCCCTTTTCCT* |
| ***BRCA2*** | *GCCGATTACCTGTGTACCCT* | *AAAAACGAGACTTTTCTCATACTGT* |
| ***FAS*** | *CTGAAGGATGAACAGTGGGCT* | *CTTTGGCATCGTCCACCAAG* |
| ***FASLG*** | *TGGCAGAACTCCGAGAGGTA* | *TCCATCCCCTTATGCCTGGT* |
| ***BAX*** | *CGGGTTGTCGCCCTTTTCTA* | *GGGGGTTGATACCACGATCC* |
| ***BCL2*** | *GTGAAAAGGACAAAGCCCCG* | *CAATGATCTCCGAAGGCGCT* |
| ***TP53*** | *CTCCCCTGCCTTCCTAGGTT* | *CGTCCCTGGGTTTGGATGTT* |
| ***CDKN1A*** | *GTCCACAGCAGGTACTCGAT* | *AGGGACAAGTGGAGCCAAAA* |
| ***PDCD1*** | *GTCCACAGCAGGTACTCGAT* | *AGGGACAAGTGGAGCCAAAA* |
| ***BCL6*** | *GCTCCCATCTCAAGCACACA* | *CAAGGTCAAGCAGGGTGTCT* |
| ***BAFF*** | *CCACTTAGAATTCAGTCCACTCC* | *AAGTTCTGAGATGGCTGATTGA* |
| ***BACH2*** | *CTGCCCGCTTTTATGGCATT* | *GGGAGGGAGAGCACACATTC* |
| ***XBP1*** | *CACCCCTCCAGAACATCTCC* | *CACCTCCAACCCCACCAAAA* |
| ***IRF4*** | *TGGTGTGTTCGGTGATGAGG* | *AGGAAGCCACTATGGTAGGAGT* |
| ***PAX5*** | *GCCTGCTCGGTCTCTGTTAC* | *AGGGACAGCGACATTTGTGA* |
| ***PRDM1*** | *TGGTGGTATGGGGCTCTGAT* | *AGCTGTATCCGACTCTGCAA* |
| ***AICDA*** | *GAAGAAGTGGGCGGGGATTC* | *GAGGGGAAAGAAGCAACCCT* |
| ***IgM*** | *CAGATATACAGTTGGGAATAAGCCT* | *TGACAGCAAGGGATGACTCC* |
| ***IgA*** | *ACAGATATACAGTTGGGAATAAGCC* | *ACAGCAATTTCTACTGTGTTAGGC* |
| ***IgG*** | *TGCTCGCCAACAAGGAAAAC* | *CCCCTAATCCTCCAAAATCGCT* |
| ***IL-10*** | *GGAAGCCAGGATCACCAACA* | *CCTTCCATGCTTTGGGGTTG* |
| ***TLR-9*** | *GACAACAGCTCTCAGTCCCC* | *ACAACCCGTCACTGTTGCTT* |
| ***r18S*** | *TAACCCGTTGAACCCCATT* | *CCATCCAATCGGTAGTAGCG* |
|  |  |  |

**Supplementary Table S3 : Cytotoxic IC₅₀ values (24 h and 8 d) unless stated otherwise such as y-Irradiation IC20 which refers to relative IC20 values and not relative IC50 derived from the four-parameter fits in main Figure 1.**

| **Time** | **Treatment** | **Relative IC50 (μM/Gy)** |
| --- | --- | --- |
| **24h** | y-Irradiation | 0.4 Gy |
| **8d** | y-Irradiation | 0.9 Gy |
| **24h** | 4-hydroperoxy ifosfamide | 14 μM |
| **8d** | 4-hydroperoxy ifosfamide | 7 μM |
| **24h** | Hydrogen Peroxide | 23 μM |
| **8d** | Hydrogen Peroxide | 60 μM |
| **24h** | 4-hydroperoxy ifosfamide RA -FLS | 7.7 |
| **24h** | Hydrogen Peroxide RA- FLS | cannot calculate |
| **24h** | y-Irradiation- IC20 | 0.1 Gy |
| **24h** | 4-hydroperoxy ifosfamide- IC20 | 3.5 μM |
| **24h** | Hydrogen Peroxide - IC20 | 6 μM |

**Supplementary Table S4: Spearman rank correlations (ρ [p]) between day-8 viability and functional read-outs (IL-10, IFN-γ, APRIL, CD25, IL-2, IgG, IgA, IgM).**

| Read-out | γ-IR-Viability-day 8 ρ (*p*) | 4-OOH IFA- Viability-day 8 ρ (*p*) | H₂O₂- Viability-day 8 ρ (*p*) |
| --- | --- | --- | --- |
| IL-10 | **0.964 (0.003)** | **0.895 (0.007)** | **0.923 (0.003)** |
| IFN-γ | 0.750 (0.066) | **0.893 (0.009)** | **0.925 (0.003)** |
| IgG | **0.972 (0.002)** | **0. 953 (0.001)** | 0.257 (0.623) |
| IgA | 0.428 (0.354) | **0.972 (0.0002)** | 0.526 (0.064) |
| IgM | **0.857 (0.013)** | **0.898 (0.006)** | 0.513 (0.238) |
| APRIL | 0.735 (0.059) | **0.958 (0.007)** | **0.856 (0.014)** |
| CD25 | **0.821 (0.0341)** | **0.9162 (0.0037)** | **0.893 (0.012)** |
| IL-2 | 0.742 (0.056) | **0.899 (0.006)** | –0.214 (0.645) |

**Supplementary Table S5: Adjusted *p*-values for γH2AX MFI: treated versus time-matched control (One ANOVA + Dunnett) across four lineages (CD4 T, CD8 T, memory-B, naïve-B), four time-points (2 h, 8 h, 16 h, 24 h) and two doses (IC₂₀, IC₅₀) for each stressor. Significant values are bold in the spreadsheet.**

| Cell Type | | CD4 T cell | CD8 T cell | Memory B cell | Naïve B cell |
| --- | --- | --- | --- | --- | --- |
| **Treatment** | **Timepoint** | **Adjusted p.value** | | | |
|  |  |  | | | |
| **y-Irradiation IC20** | **2h** | **0.0172** | **0.0090** | **0.0172** | **0.0062** |
| **8h** | **0.0040** | **0.0081** | **0.0054** | **0.0501** |
| **16h** | 0.1882 | 0.1555 | 0.0629 | 0.2479 |
| **24h** | **0.0092** | 0.0643 | **0.0174** | **0.0125** |
| **y-Irradiation IC50** | **2h** | **0.0012** | **0.0109** | **0.0028** | **<0.0001** |
| **8h** | **0.0072** | **0.0010** | **0.0177** | **0.0034** |
| **16h** | **0.0286** | **0.0267** | **0.0348** | **0.0010** |
| **24h** | **0.0012** | **<0.0001** | **0.0034** | **0.0093** |
| **4-OOH IFA IC20** | **2h** | 0.0851 | 0.4705 | **0.0261** | **>0.0999** |
| **8h** | **0.0147** | **0.0108** | **0.0126** | **0.0070** |
| **16h** | **0.0078** | **0.0114** | **0.0001** | **0.0499** |
| **24h** | **0.0016** | **<0.0001** | **0.0024** | **<0.0001** |
| **4-OOH IFA IC50** | **2h** | **0.0096** | 0.2448 | **0.0012** | **0.0326** |
| **8h** | **0.0049** | **0.0019** | **<0.0001** | 0.0703 |
| **16h** | **0.0074** | **0.0396** | **0.0028** | **0.0063** |
| **24h** | **0.0002** | **0.0034** | **0.0044** | **0.0058** |
| **H202 IC20** | **2h** | 0.6530 | 0.7292 | 0.7209 | **0.0047** |
| **8h** | **0.0033** | **0.0306** | **0.0082** | **0.0042** |
| **16h** | **0.0103** | 0.0835 | **0.0376** | **0.0021** |
| **24h** | **0.0040** | **0.0212** | **0.0013** | **0.0034** |
| **H202 IC50** | **2h** | 0.1629 | 0.0999 | **0.0015** | 0.0846 |
| **8h** | **0.0102** | 0.0683 | **0.0018** | **0.0084** |
| **16h** | **0.0103** | 0.1106 | **0.0177** | 0.2111 |
| **24h** | **0.0007** | **0.0051** | **0.0016** | **0.0118** |
